# Supplementary material for: Myoepithelial cells are a dynamic barrier to epithelial dissemination
Source: PubMed Central journal article supplement — J Cell Biol. 2018 Oct 1;217(10):3368–81. doi: 10.1083/jcb.201802144 (PMC6168248; doi:10.1083/jcb.201802144), 2018-10-01
Supplement: JCB_201802144_sm.pdf [file JCB_201802144_sm.pdf]

## Supplemental material

Sirka et al., <https://doi.org/10.1083/jcb.201802144>

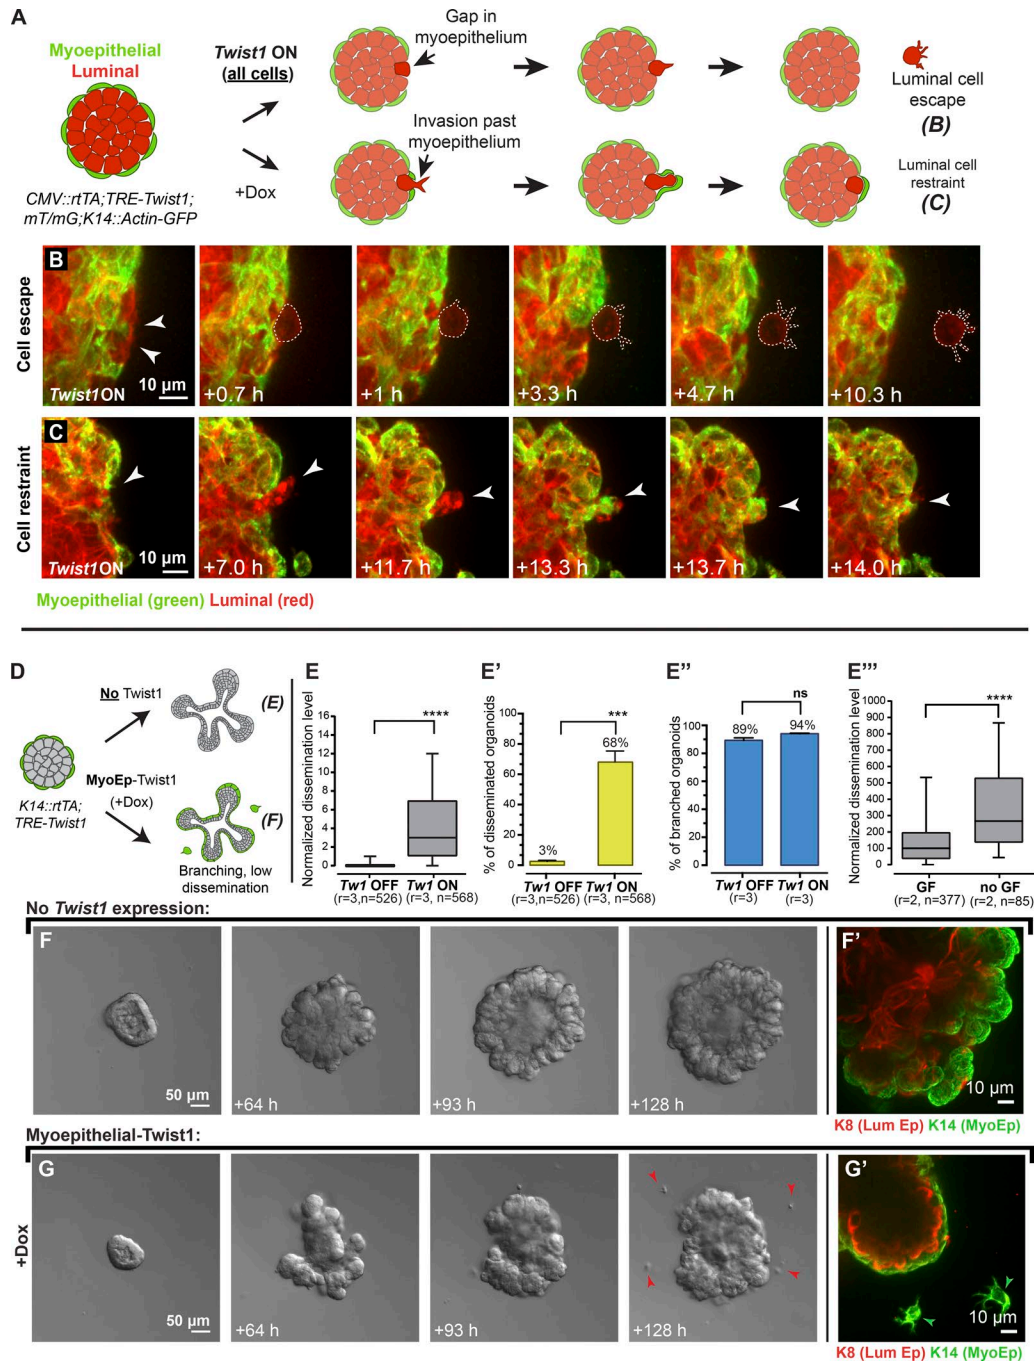

Figure S1. **The myoepithelium appears to restrain protruding *Twist1*<sup>+</sup> luminal cells in the Ubiquitous-Twist1 model, and *Twist1* expression results in cell-autonomous dissemination in the Myoepithelial-Twist1 model.** (A) Fluorescent reporters were used to monitor real-time interactions between myoepithelial cells and luminal cells in *CMV::rtTA;TRE-Twist1;mT/mG;K14::Actin-GFP* organoids with constitutive *Twist1* expression. (B) Luminal cells (white dotted lines) were observed to disseminate through gaps in the myoepithelium. (C) Luminal cells that protruded past the myoepithelium (arrowheads) could also be restrained by myoepithelial cells. (D) Myoepithelial-specific *Twist1* expression was induced with doxycycline (Dox) in organoids isolated from *K14::rtTA;TRE-Twist1* mice. (E and E') Dissemination occurred in 68% of organoids upon addition of doxycycline. (E'') Organoids branched at similar rates with and without *Twist1* expression. (E''') Dissemination levels were increased in the absence of FGF2 (GF). (F and F') Control organoids maintained normal tissue architecture. (G and G') In contrast, myoepithelial *Twist1* expression resulted in dissemination (red arrowheads) of K14<sup>+</sup> cells (green arrowheads). K8<sup>+</sup> cells remained within the organoid. n, total number of organoids; r, number of biological replicates. Data in E and E''' were analyzed by two-tailed nonparametric Mann-Whitney-Wilcoxon test: \*\*\*\*, P < 0.0001. Data are presented as box plots, with error bars representing the 5th to 95th percentile. Data in E' and E'' was analyzed by two-tailed unpaired t test with equal SD; \*\*\*, P < 0.001. Error bars represent mean  $\pm$  SEM.

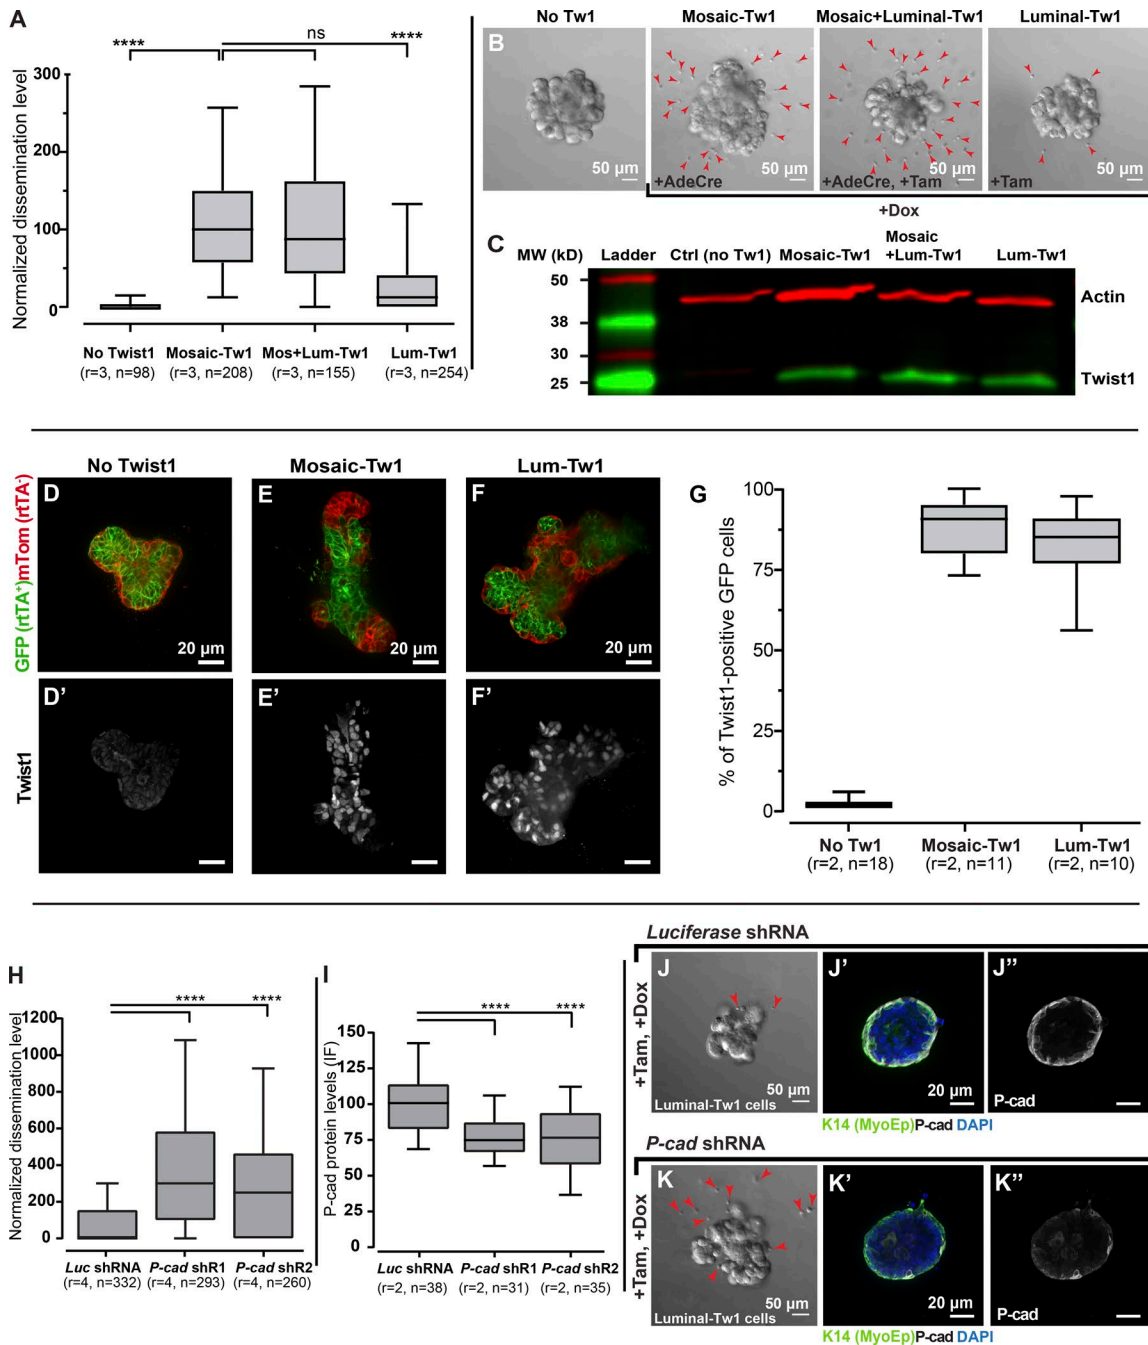

**Figure S2. Luminal-specific *Twist1* expression rarely results in dissemination despite abundant *Twist1*<sup>+</sup> cells and is increased by *P-cadherin* knock-down.** (A) Dissemination was quantified in *K8::Cre-ER;R26::LSL-rtTA;TRE-Twist1* organoids with no *Twist1* expression (no *Twist1*) versus those with *Twist1* expression regulated by Adeno-Cre-(Mosaic-*Twist1*), by both Adeno-Cre and a tamoxifen (Tam)-inducible Cre-ER(Mosaic+Lum-Tw1), and by tamoxifen-inducible Cre-ER alone (Lum-Tw1). (B) Representative images of the conditions from A. Arrowheads indicate disseminated cells. (C) Western blot of the conditions from A showing that *Twist1* protein levels are similar across methods of *Twist1* induction and not affected by tamoxifen addition. (D–G) Nuclear *Twist1* was observed in a majority of recombined GFP-positive cells in Mosaic-*Twist1* and Luminal-*Twist1* models. (H–K’’) Organoids isolated from *K8::Cre-ER;R26::LSL-rtTA;TRE-Twist1* mice were treated with lentiviral shRNA against *Luciferase* (control) and two different hairpins targeting *P-cadherin* (*P-cad*; myoepithelial adhesion gene). Organoids were treated with tamoxifen to induce *rtTA* expression and cultured in doxycycline (Dox) to induce *Twist1* expression in the luminal cell compartment. Organoids were divided into control and *P-cadherin* knockdown treatment groups. The number of disseminated cells per organoid was significantly higher in *P-cadherin* knockdown organoids compared with the control (two- to threefold difference) across four biological replicates (H, J, and K). Red and white arrowheads indicate disseminated cells. *P-cadherin* protein levels quantified from IF images confirmed a decrease in *P-cadherin* protein in *P-cadherin* knockdown organoids (I). IF demonstrated retention of K14 and reduction in *P-cadherin* in *P-cadherin* knockdown organoids (K’ and K’’). n, total number of organoids; r, number of biological replicates. Data were analyzed by two-tailed nonparametric Kruskal–Wallis multiple comparisons test: \*\*\*\*,  $P < 0.0001$ . Data are presented as box plots, with error bars representing the 5th to 95th percentile.

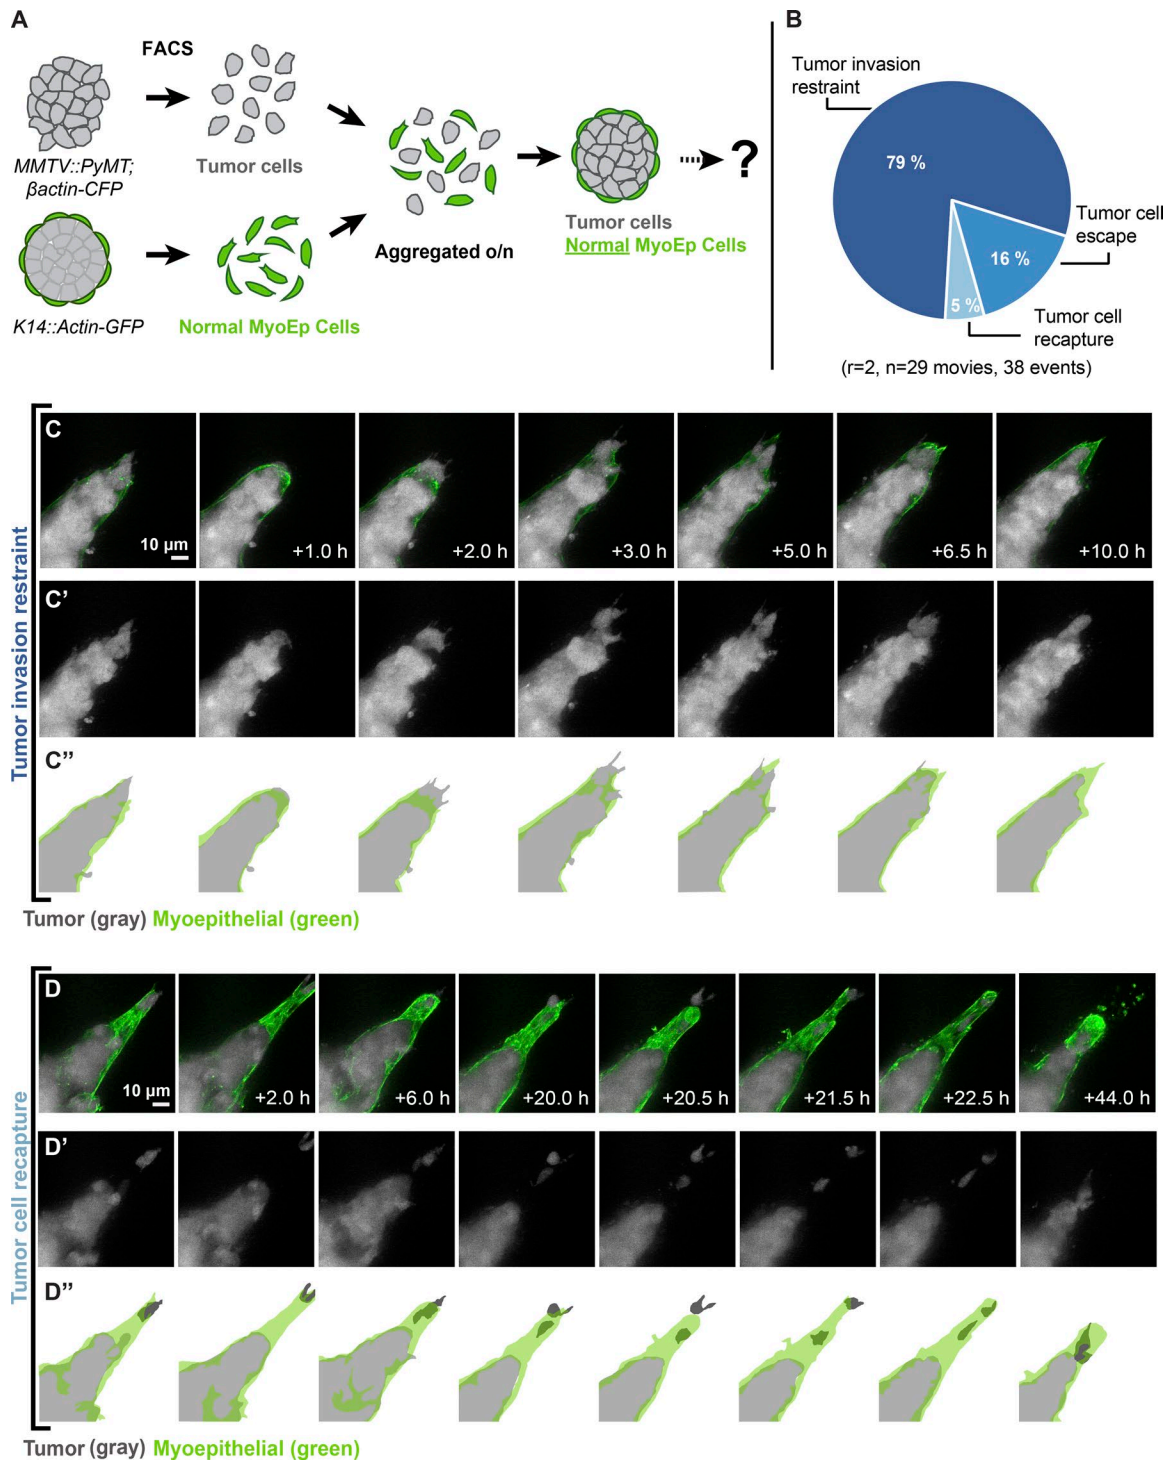

Figure S3. **Normal myoepithelial cells suppress invasion and dissemination of PyMT tumor cells.** (A) Tumor cells (CFP<sup>+</sup>; gray) were isolated from *MMTV::PyMT*; $\beta$ actin-CFP mice, and normal myoepithelial cells (GFP<sup>+</sup>; green) were isolated from *mT/mG*;*K14::Actin-GFP* mice via FACS. Tumor cells were aggregated with normal myoepithelial cells at different ratios to form clusters, and aggregated clusters were cultured in 3D collagen I. (B) Tumor cell restraint, recapture, and dissemination quantified from real-time confocal videos across multiple replicates. (C–C'') Myoepithelial cells appeared to suppress invasion of tumor cells by containing the invasive front and reestablishing a continuous myoepithelial layer. (D–D'') Myoepithelial cells were also observed to extend into the collagen and capture disseminated tumor cells.  $n$ , total number of videos analyzed;  $r$ , number of biological replicates. Myoepithelial cells in time-lapse videos are pseudocolored in green throughout the figure.

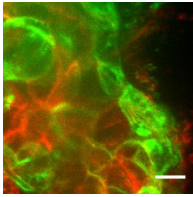

Video 1. **Luminal cell dissemination past normal myoepithelium.** 3D confocal time-lapse video portrays a rare event of Twist1<sup>+</sup> luminal cell (red) disseminating through the Twist1<sup>-</sup> myoepithelium (green) in a *K8::Cre-ER;R26::LSL-rtTA;TRE-Twist1;mT/mG* organoid (corresponds with Fig. 2 B). Frames were collected every 20 min for 17 h using a Solamere Technology Group spinning-disk confocal microscope with a 40×LD-LCI C-Apochromat oil lens. Video displayed at seven frames/s. Bar, 10 μm. Myoepithelial cells in the time-lapse video are pseudocolored in green.

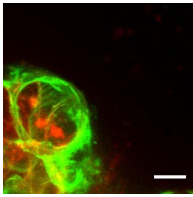

Video 2. **The myoepithelium dynamically restrains protruding Twist1<sup>+</sup> luminal cells.** Representative 3D confocal time-lapse video of Twist1<sup>+</sup> luminal cells (red) protruding past the Twist1<sup>-</sup> myoepithelium (green) in a *K8::Cre-ER;R26::LSL-rtTA;TRE-Twist1;mT/mG* organoid. Adjacent myoepithelial cells migrated over and contained luminal cells (corresponds with Fig. 2 C). Frames were collected every 20 min for 12 h using a Solamere Technology Group spinning-disk confocal microscope with a 40×LD-LCI C-Apochromat oil lens. Video displayed at seven frames/s. Bar, 10 μm. Myoepithelial cells in the time-lapse video are pseudocolored in green.

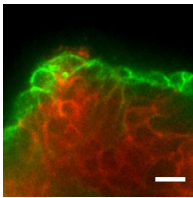

Video 3. **The myoepithelium contains protruding Twist1<sup>+</sup> luminal cells.** An additional representative 3D confocal time-lapse video of Twist1<sup>+</sup> luminal cells (red) protruding past the Twist1<sup>-</sup> myoepithelium (green) in a *K8::Cre-ER;R26::LSL-rtTA;TRE-Twist1;mT/mG* organoid. Luminal cells that protruded past the myoepithelium were restrained by myoepithelial cells. Frames were collected every 20 min for 12 h using a Solamere Technology Group spinning-disk confocal microscope with a 40×LD-LCI C-Apochromat oil lens. Video displayed at seven frames/s. Bar, 10 μm. Myoepithelial cells in the time-lapse video are pseudocolored in green.

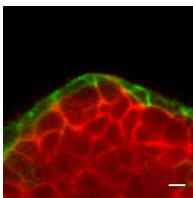

Video 4. **The myoepithelium restrains from escape a protruding Twist1<sup>+</sup> luminal cell.** A 3D confocal time-lapse video of a Twist1<sup>+</sup> luminal cell (red) protruding past the Twist1<sup>-</sup> myoepithelium (green) in a *K8::Cre-ER;R26::LSL-rtTA;TRE-Twist1;mT/mG* organoid and being restrained from escape. Frames were collected every 20 min for 12 h using a Solamere Technology Group spinning-disk confocal microscope with a 40×LD-LCI C-Apochromat oil lens. Video displayed at seven frames/s. Bar, 10 μm. Myoepithelial cells in the time-lapse video are pseudocolored in green.

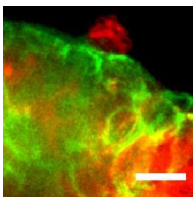

Video 5. **The myoepithelium covers and contains a protruding Twist1<sup>+</sup> luminal cells.** An additional 3D confocal time-lapse video of a Twist1<sup>+</sup> luminal cell (red) protruding past the Twist1<sup>-</sup> myoepithelium (green) in a *K8::Cre-ER;R26::LSL-rtTA;TRE-Twist1;mT/mG* organoid and being contained by adjacent myoepithelial cells. Frames were collected every 20 min for 12 h using a Solamere Technology Group spinning-disk confocal microscope with a 40×LD-LCI C-Apochromat oil lens. Video displayed at seven frames/s. Bar, 10 μm. Myoepithelial cells in the time-lapse video are pseudocolored in green.

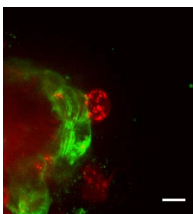

Video 6. **Luminal cell dissemination past SMA-depleted myoepithelium.** Organoids isolated from *K8::Cre-ER;R26::LSL-rtTA;TRE-Twist1;mT/mG* mice infected with lentiviral shRNA against *SMA*. Representative 3D confocal time-lapse video of Twist1<sup>+</sup> luminal cells (red) escaping through SMA<sup>-</sup> myoepithelium (green; corresponds with Fig. 4 F). Frames were collected every 20 min for 11 h using a Solamere Technology Group spinning-disk confocal microscope with a 40×LD-LCI C-Apochromat oil lens. Video displayed at seven frames/s. Bar, 10 μm. Myoepithelial cells in the time-lapse video are pseudocolored in green.

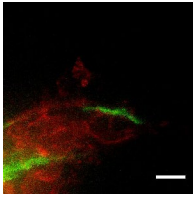

Video 7. **Normal myoepithelial cells limit invasion of basal tumor cells.** Tumor cells isolated from *C3-1-Tag;mT/mG* mice and normal myoepithelial cells isolated from *K14::Actin-GFP* mice were aggregated at different ratios to form clusters, followed by culturing aggregated clusters in 3D collagen I. 3D confocal time-lapse video portrays myoepithelial cells (green) restraining invasion of tumor cells (red) past the myoepithelial layer and reestablishing a continuous myoepithelial layer (corresponds with Fig. 5 D). Frames were collected every 30 min for 30 h using a Solamere Technology Group spinning-disk confocal microscope with a 40×LD-LCI C-Apochromat oil lens. Video displayed at seven frames/s. Bar, 10 μm. Myoepithelial cells in the time-lapse video are pseudocolored in green.

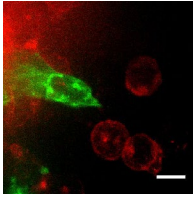

Video 8. **Normal myoepithelial cells recaptures disseminated basal tumor cells.** Tumor cells isolated from *C3-1-Tag;mT/mG* mice and normal myoepithelial cells isolated from *K14::Actin-GFP* mice were aggregated at different ratios to form clusters, followed by culturing aggregated clusters in 3D collagen I. 3D confocal time-lapse video portrays myoepithelial cells (green) reaching into collagen I and capturing disseminated tumor cells (red; corresponds with Fig. 5 E). Frames were collected every 30 min for 36 h using a Solamere Technology Group spinning-disk confocal microscope with a 40×LD-LCI C-Apochromat oil lens. Video displayed at 7 frames/s. Bar, 10 μm. Myoepithelial cells in the time-lapse video are pseudocolored in green.
